# Supplementary material
Source: PubMed Central journal article supplement (PMC10627166)
Supplement: NIHMS1938826-supplement-1.pdf [file NIHMS1938826-supplement-1.pdf]

# Patient Perspectives on Telehealth for Operating Rooms

---

Start of Block: Eligibility Questions

---

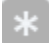

Q1 What is your age?

---

*Skip To: Q28 If Q1 < 18*

---

Q2 Do you currently live in the United States?

Yes (1)

No (2)

*Skip To: Q28 If Q2 = No*

---

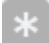

Q33 What state do you live in?

---

---

Page Break

Display This Question:

If If What is your age? Text Response Is Less Than 18

Or Q2 = No

Q28 Unfortunately, you do not meet the criteria for the survey.

Skip To: End of Survey If Q28() Is Displayed

End of Block: Eligibility Questions

---

Start of Block: Scenario Questions

Q4 Doctor and nurse members of the anesthesia care team (anesthesiologists and certified registered nurse anesthetists) ensure that patients having surgeries are safe and comfortable. They watch for possible problems (like bleeding, not enough oxygen, low blood pressure), and take steps to correct these. The next several questions are related to the following scenario: ***Imagine that you need to have surgery under general anesthesia (meaning that you will be unconscious during the surgery). In addition to the anesthesia doctors and nurses in the operating room, imagine that there are also anesthesia doctors and nurses keeping track of your surgery, in a different room, on a computer screen. On this screen, the doctors and nurses can see information about the medications given to you by the anesthesia team during surgery, your blood pressure, heart rate, temperature, and organ function. The doctors and nurses keeping track of your progress on the computer screen can talk to the anesthesia doctors and nurses in the operating room if they notice anything that looks unusual, risky, or concerning about your health and well-being during surgery.***

Overall, how comfortable do you feel with this scenario?

- Very comfortable (1)
  - Comfortable (2)
  - Neither comfortable nor uncomfortable (3)
  - Uncomfortable (4)
  - Very uncomfortable (5)
- 

Q25 If given a choice, how likely would you be to choose to have doctors and nurses keep track of your health and safety status on a computer screen from a location outside the operating

room while the surgery progresses? This additional tracking would not increase the cost of your care.

- Extremely likely (1)
  - Somewhat likely (2)
  - Neither likely nor unlikely (3)
  - Somewhat unlikely (4)
  - Extremely unlikely (5)
- 

Q5

What is your first reaction to this scenario?

---

---

---

---

---

Q6 What do you feel are the pros of this scenario?

---

---

---

---

---

Q7 What do you feel are the cons of this scenario?

---

---

---

---

---

-----

Page Break 

---

**Q8 Please tell us how much you agree or disagree with the following statement:**

I understand *why* other doctors and nurses might keep track of my health status on a computer screen from a location outside the operating room, while surgery progresses.

- Strongly agree (1)
  - Somewhat agree (2)
  - Neither agree nor disagree (3)
  - Somewhat disagree (4)
  - Strongly disagree (5)
- 

**Q9 Please tell us how much you agree or disagree with the following statement:**

Having doctors and nurses keep track of my well being on a computer screen while my surgery progresses would *improve my surgery outcomes*.

- Strongly agree (1)
  - Somewhat agree (2)
  - Neither agree nor disagree (3)
  - Somewhat disagree (4)
  - Strongly disagree (5)
-

**Q10 Please tell us how much you agree or disagree with the following statement:**

Having a doctor and nurse keep track of my well-being on a computer screen while my surgery progresses would *worsen my surgery outcomes*.

- Strongly agree (1)
  - Somewhat agree (2)
  - Neither agree nor disagree (3)
  - Somewhat disagree (4)
  - Strongly disagree (5)
- 

**Q11 Please tell us how much you agree or disagree with the following statement:**

Having doctors and nurses keep track of my well-being on a computer screen while my surgery progresses would *improve the quality of care I would receive*.

- Strongly agree (1)
  - Somewhat agree (2)
  - Neither agree nor disagree (3)
  - Somewhat disagree (4)
  - Strongly disagree (5)
-

**Q12 Please tell us how much you agree or disagree with the following statement:**

Having doctors and nurses keep track of my well-being on a computer screen while my surgery progresses would *worsen the quality of care I would receive*.

- Strongly agree (1)
  - Somewhat agree (2)
  - Neither agree nor disagree (3)
  - Somewhat disagree (4)
  - Strongly disagree (5)
- 

**Q14 Please tell us how much you agree or disagree with the following statement:**

Having doctors and nurses keep track of my well-being on a computer screen while my surgery progresses would *improve my safety*.

- Strongly agree (1)
  - Somewhat agree (2)
  - Neither agree nor disagree (3)
  - Somewhat disagree (4)
  - Strongly disagree (5)
-

**Q15 Please tell us how much you agree or disagree with the following statement:**

Having doctors and nurses keep track of my well-being on a computer screen while my surgery progresses would *worsen my safety*.

- Strongly agree (1)
  - Somewhat agree (2)
  - Neither agree nor disagree (3)
  - Somewhat disagree (4)
  - Strongly disagree (5)
- 

**Q16 In this scenario, how concerned would you be about the privacy of your health information?**

- Not at all concerned (1)
  - Slightly concerned (2)
  - Somewhat concerned (3)
  - Very concerned (4)
- 

**Q18 How concerned would you be about the anesthesia doctors and nurses caring for you in the operating room getting distracted by the doctors and nurses who would be monitoring your health and well-being on a computer from a location outside the operating room?**

- Not at all concerned (1)
  - Slightly concerned (2)
  - Somewhat concerned (3)
  - Very concerned (4)
-



Q38 How concerned would you be that your anesthesia doctors and nurses caring for you in the operating room would rely too much on the anesthesia doctors and nurses who would be monitoring your health status on a computer while the surgery progresses?

- Not at all concerned (1)
  - Slightly concerned (2)
  - Somewhat concerned (3)
  - Very concerned (4)
- 

Q41 Please answer B to this question

- A (1)
  - B (2)
  - C (3)
  - D (4)
- 

Q21 How comfortable would you be with *doctors and nurses you knew* keeping track of your health and safety status on a computer screen from a location outside the operating room while the surgery progresses?

- Extremely comfortable (1)
  - Somewhat comfortable (2)
  - Neither comfortable nor uncomfortable (3)
  - Somewhat uncomfortable (4)
  - Extremely uncomfortable (5)
-

Q24 How comfortable would you be with *doctors and nurses you did not know, who are part of the same hospital where you were having surgery*, keeping track of your health and safety status on a computer screen from a location outside the operating room while the surgery progresses?

- Extremely comfortable (1)
  - Somewhat comfortable (2)
  - Neither comfortable nor uncomfortable (3)
  - Somewhat uncomfortable (4)
  - Extremely uncomfortable (5)
- 

Q39 How comfortable would you be with *doctors and nurses you did not know, who are part of a different hospital or health system in the United States*, keeping track of your health and safety status on a computer screen from a location outside the operating room while the surgery progresses?

- Extremely comfortable (1)
  - Somewhat comfortable (2)
  - Neither comfortable nor uncomfortable (3)
  - Somewhat uncomfortable (4)
  - Extremely uncomfortable (5)
-

Q24 How comfortable would you be with *doctors and nurses you did not know, who are part of a hospital or health system in another country*, keeping track of your health and safety status on a computer screen from a location outside the operating room while the surgery progresses?

- Extremely comfortable (1)
  - Somewhat comfortable (2)
  - Neither comfortable nor uncomfortable (3)
  - Somewhat uncomfortable (4)
  - Extremely uncomfortable (5)
- 

Q26 Would you have other concerns about this scenario that we did not ask you about?

---

---

---

---

---

End of Block: Scenario Questions

---

Start of Block: Medical History Questions

Q27 Please tell us more about your health history so we can understand how your answers might relate to your health.

In general, how would you describe your health?

- Excellent (1)
  - Very Good (2)
  - Good (3)
  - Fair (4)
  - Poor (5)
- 

Q29 Have you ever had surgery under general anesthesia?

- Yes (1)
  - No (2)
  - Don't know/Don't remember (3)
- 

Q31 Have you have surgery, under general anesthesia, in the past 12 months?

- Yes (1)
- No (2)
- Don't know/Don't remember (3)

*Skip To: Q32 If Q31 = Yes*

---

*Display This Question:*

*If Q31 = Yes*

Q32 How satisfied are you with the outcome of your most recent surgery under general anesthesia ?

- Extremely satisfied (1)
- Somewhat satisfied (2)
- Neither satisfied nor dissatisfied (3)
- Somewhat dissatisfied (4)
- Extremely dissatisfied (5)

End of Block: Medical History Questions

---

Start of Block: Demographic Questions

Q34 How would you describe where you currently live?

- Rural (1)
  - Urban (2)
  - Suburban (3)
- 

Q35 The next two questions are about your race and ethnicity. To understand more about people who participate in research projects, we would like to record this information using specific categories.

Are you Latino or Hispanic?

- Yes (1)
  - No (2)
-

Q36 Which category or categories best describe you? Please select all answers that apply to you. You can select more than one.

- Black or African American (1)
  - American Indian or Alaska Native (2)
  - Asian (3)
  - Native Hawaiian or Pacific Islander (4)
  - White or Caucasian (5)
  - Other (specify) (6) \_\_\_\_\_
- 

Q38 What is the highest level of formal education you have completed?

- Less than high school (1)
  - Some high school (2)
  - A high school diploma or GED (3)
  - Some college or technical training (4)
  - A college degree (5)
  - A graduate or professional degree (6)
-

Q37 What is your gender?

- Female (1)
  - Male (2)
  - Other (Feel free to describe in your own words) (3)
- 

-----

Q39 What is your employment status? Please select all answers that apply to you. You can select more than one.

- I work full-time (40 hours or more per week) (1)
  - I work part-time (less than 40 hours per week) (2)
  - I am unemployed (3)
  - I am a homemaker (4)
  - I am retired (5)
  - I am a student (6)
  - I am disabled and not able to work (7)
-

Q40 What was your total household income before taxes during the past 12 months? *You can estimate this number. Include your income, the income of your spouse (if applicable), and the income of your dependents (if any).*

- Less than \$10,000 (1)
- \$10,000 - \$24,999 (2)
- \$25,000 - \$39,999 (3)
- \$40,000 - \$64,999 (5)
- \$65,000 - \$79,999 (6)
- \$80,000 - \$100,000 (7)
- More than \$100,000 (8)

**End of Block: Demographic Questions**

---
